# Supplementary material for: A new drug for an old concept: aptamer to von Willebrand factor for prevention of arterial and microvascular thrombosis
Source: PubMed Central journal article supplement — Haematologica. 2020 Nov 1;105(11):2512–5. doi: 10.3324/haematol.2020.261081 (PMC7604565; doi:10.3324/haematol.2020.261081), 2020-11-01
Supplement: 2020_261081-Disclosure.pdf [file 2020_261081-Disclosure.pdf]

Haematologica  
HAEMATOL/2020/261081  
Version 1

A new drug for an old concept: aptamer to von Willebrand factor for prevention of arterial and microvascular thrombosis

Agnès Veyradier

Disclosures: Conflict of interest. AV is a member of Advisory boards for SANOFI-AVENTIS, SHIRE-TAKEDA and ROCHE-CHUGAI and received honorarium from LFB Biomédicaments and OCTAPHARMA.
